# Supplementary material for: Comparable Intestinal and Hepatic First-Pass Effect of YL-IPA08 on the Bioavailability and Effective Brain Exposure, a Rapid Anti-PTSD and Anti-Depression Compound
Source: Front Pharmacol. 2020 Nov 27;11:588127. doi: 10.3389/fphar.2020.588127 (PMC7732531; doi:10.3389/fphar.2020.588127)
Supplement: Supplementary file 2 [file datasheet2.xlsx]

## Sheet: Fig2-data
	Metabolic stability of YL-IPA08 in microsomes (Mean±SD,n=3)
	Time (min)	YL-IPA08 percent of remaining (%)
		NADPH (HLM)			UDPGA (HLM)
	0	100	100	100	100	100	100
	2	69.5226	73.2394	69.0088	96.8487	100.724	100.319
	5	35.4957	46.3615	40.1506	97.479	102.792	100.956
	8	19.2166	30.7512	20.5772	101.576	98.8625	100.638
	15	6.9	12.2066	7.13927	101.996	98.4488	100.531
	30				102.836	105.481	104.463
	Time (min)	YL-IPA08 percent of remaining (%)
		NADPH (RLM)			UDPGA (RLM)
	0	100	100	100	100	100	100
	2	15.3846	14.7115	12.5	100.962	94.1346	117.308
	5	1.75	1.78846	0.829808	97.1154	92.4038	98.0769
	8	0.121154	0.0959615	0.109615	100	92.3077	90.2885
	15				98.0769	96.0577	104.808
	30				98.0769	97.1154	102.885
	Time (min)	YL-IPA08 percent of remaining (%)
		NADPH (HIM)			UDPGA (HIM)
	0	100	100	100	100	100	100
	2	78.2022	80.6796	74.4118	96.9466	92.2481	116.071
	5	71.9101	82.0388	67.6471	111.45	95.3488	100.893
	15	43.8202	50.8738	44.7059	90.8397	88.3721	100.893
	30	22.0225	27.9612	27.8431	88.5496	90.6977	99.1071
	60	12.9213	16.6019	15.6863	90.0763	93.0233	96.4286
	Time (min)	YL-IPA08 percent of remaining (%)
		NADPH (RIM)			UDPGA (RIM)
	0	100	100	100	100	100	100
	2	100.806	91.5966	100	106.422	101.667	95.2381
	5	95.2819	89.916	102.727	98.1651	101.667	94.4444
	15	92.1749	76.3025	78.6364	103.67	100	93.6508
	30	90.8654	74.2017	70.9091	100.917	101.667	93.6508
	60	71.2313	68.6555	69.94	101.835	98.3333	96.0317

## Sheet: Fig3-data
	Plasma concentrations of rats after oral administration and intravenous
	administration of different doses of YL-IPA08 (Mean±SD, n=6)
	Time (h)	Concentration (ng/ml)
		p.o. (mg/kg)			i.v. (mg/kg)
		1	3	10	0.3
	0.033	/	/	/	219.5±32.45
	0.083	5.43±1.96	18.9±16.63	60.7±45.1	139.83±36.25
	0.25	5.22±0.65	9.25±4.57	20.5±8.3	38.88±5.41
	0.5	3.71±0.79	7.42±3.58	15.9±4.1	18.25±1.29
	1	3±0.8	6.3±3.02	10.2±3.5	8.44±1.06
	2	1.65±0.44	4.07±0.73	7.1±2.7	4.3±0.57
	4	1.02±0.55	3.5±0.73	5.63±2.23	1.84±0.39
	6	0.63±0.31	2.35±0.96	4.39±2.71	1.09±0.22
	8	0.63±0.25	1.95±0.51	3.61±2.13	0.81±0.08
	12	0.56±0.27	0.84±0.26	3.18±1.43	0.48±0.06
	24	/	/	1.04±0.66	/

## Sheet: Fig4-data
Plasma concentration of YL-IPA08 in rats after intravenous and oral combination with ABT (Mean±SD, n=6)
Time (h)	Concentration (ng/ml)
	i.v. 50 mg/kg ABT		p.o. 100 mg/kg ABT
	i.v. 0.5 mg/kg YL-IPA08	p.o. 1mg/kg YL-IPA08	i.v. 0.1 mg/kg YL-IPA08	p.o. 1 mg/kg YL-IPA08
0.033	398.5±77.83	/	464.67±68.74	/
0.083	284.67±28.22	9.32±7.18	397.67±51.26	545.53±637.39
0.25	208±29.37	28.22±25.21	265.5±55.2	402.72±402.43
0.5	156±21.48	30.28±35.35	245.33±30.4	370.37±354.2
1	113.17±14.73	34.81±50.35	191.83±16.53	334.27±247.16
2	54.8±11.8	30.5±42	114.38±13.7	245.92±149.97
4	17.55±5.36	13.32±17.09	38.72±13.71	125.23±71.65
6	10.77±3.07	6.4±4.73	14.48±3.66	47.68±28.61
8	8.91±3.06	4.51±2.58	8.97±2.63	34.21±19.59
12	6.73±2.47	3.98±4.24	4.58±1.17	17.42±8.5
24	2.01±0.93	1.28±0.53	0.65±0.29	1.39±0.98

## Sheet: Fig5-date
	Jugular vein and portal vein plasma concentrations of YL-IPA08 after oral administration
	(1mg/kg) in double cannulated rats (Mean±SD, n=6)
	Time (h)	Concentration (ng/ml)
		Jugular vein	portal vein
	0.083	68.10±59.83	161.75±102.07
	0.25	77.08±20.41	170.50±47.45
	0.5	77.00±22.69	111.40±22.00
	1	75.48±26.69	101.93±40.76
	2	78.33±38.34	91.33±38.19
	4	34.08±13.60	41.78±20.79
	6	11.66±3.90	12.85±4.33
	8	5.23±1.47	5.62±1.64
	12	1.96±0.66	1.98±0.88

## Sheet: Tab2-date
	Transcellular transport of positive control drug in Caco-2 cell line (Mean±SD,n=3)
	Time	Concentration (nM)
		Atenolol	Propranolol	Digoxin
	DOA	10550±707	10633±2369	11683±3499
	DOB	10337±574	10367±1118	12667±2619
	A-B-B-90min	2±1	79±26	9±2
	B-A-A-90min	10±5	172±19	203±27
	A-B-A-90min	7683±1484	4608±430	8117±473
	B-A-B-90min	9117±846	7267±597	8867±388
	Transcellular transport of YL-IPA08 in Caco-2 cell line (Mean±SD,n=3)
	Time	Concentration (nM)
	DOA	8350±173
	DOB	8883±436
	A-B-B-60 min	13±4
	B-A-A-60 min	28±8
	A-B-B-90 min	36±25
	B-A-A-90 min	68±27
	A-B-B-120 min	50±17
	B-A-A-120 min	105±14
	A-B-A-120 min	1755±135
	B-A-B-120 min	2598±360

## Sheet: Tab3-date
	Concentration of YL-IPA08 in buffer and sample rooms after incubation in different biomatrices for 4 h (Mean±SD,n=6)
	Biomatrices	Concentration (nM)
		Cbuffer chamber	Cplasma/microsome chamber
	Rat plasma	5.44±0.33	872.67±32.52
	Human plasma	0.83±0.19	958.33±44.75
	HLM (0.2mg/ml)	198.00±10.01	418.67±19.55
	RLM (0.2mg/ml)	168.00±5.66	393.00±18.03
	Rat brain homogentate	18.85±0.21	788.33±8.39
